# Supplementary material
Source: Springer Nature journal article supplement (https://www.springermedizin.de/resource/supplementary/12959_2014_226_MOESM1_ESM.pdf/9569300)

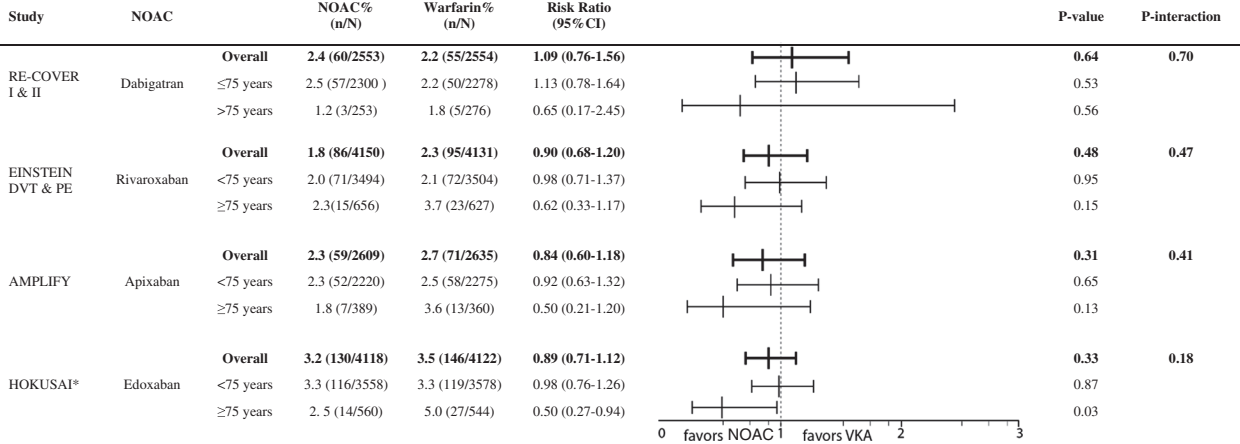

\*Numbers given for the overall study period

Supplement: MOESM1 [file 9569300]
